# Supplementary material for: Synthesis of N-P-Fluorothiosemicarbazone and of bis(N-P-Fluorophenylthiourea). Crystal Structure and Conformational Analysis of N, N’-bis(4-Fluorophenyl)hydrazine-1,2-Bis(carbothioamide)
Source: Preprints.org preprint supplement (doi:10.20944/preprints202410.2567.v1), 2024-10-31
Supplement: Supplementary file 1 [file supplementary]

## Supporting Material

### Synthesis of *N-p*-fluorothiosemicarbazone and of bis(*N-p*-fluorophenylthiourea). Crystal structure and conformational analysis of *N,N'*-bis(4-fluorophenyl)hydrazine-1,2-bis(carbothioamide).

Sirine Salhi, Dorra Kanzari-Mnallah, Isabelle Jourdain, Michael Knorr <sup>2</sup>, Carsten Strohmann, Jan-Lukas Kirchhoff, Hédi Mrabet and Azaiez Ben Akacha

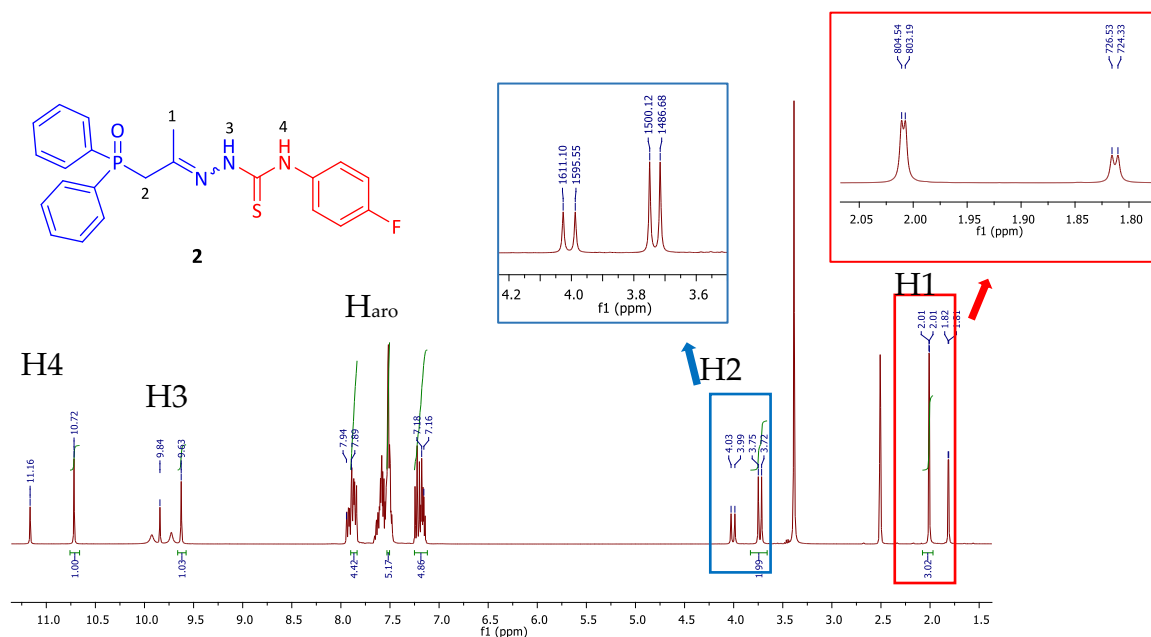

Figure S1. <sup>1</sup>H NMR spectrum (400 MHz, DMSO-*d*<sub>6</sub>) of compound **2** at 298 K.

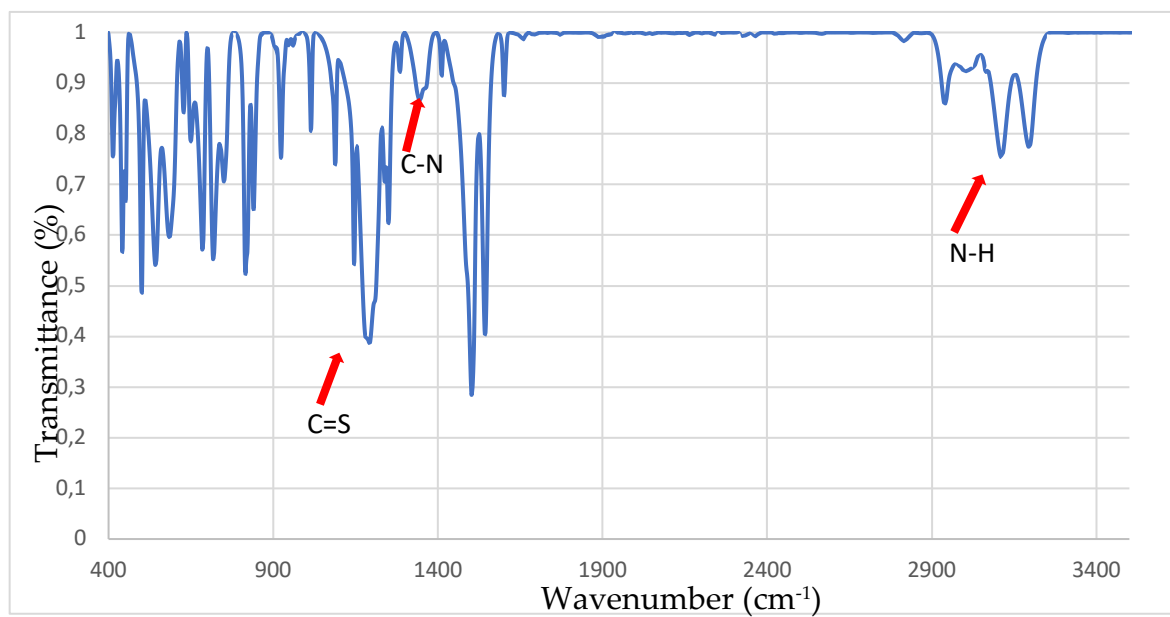

**Figure S2.** IR-ATR spectrum of compound **3**

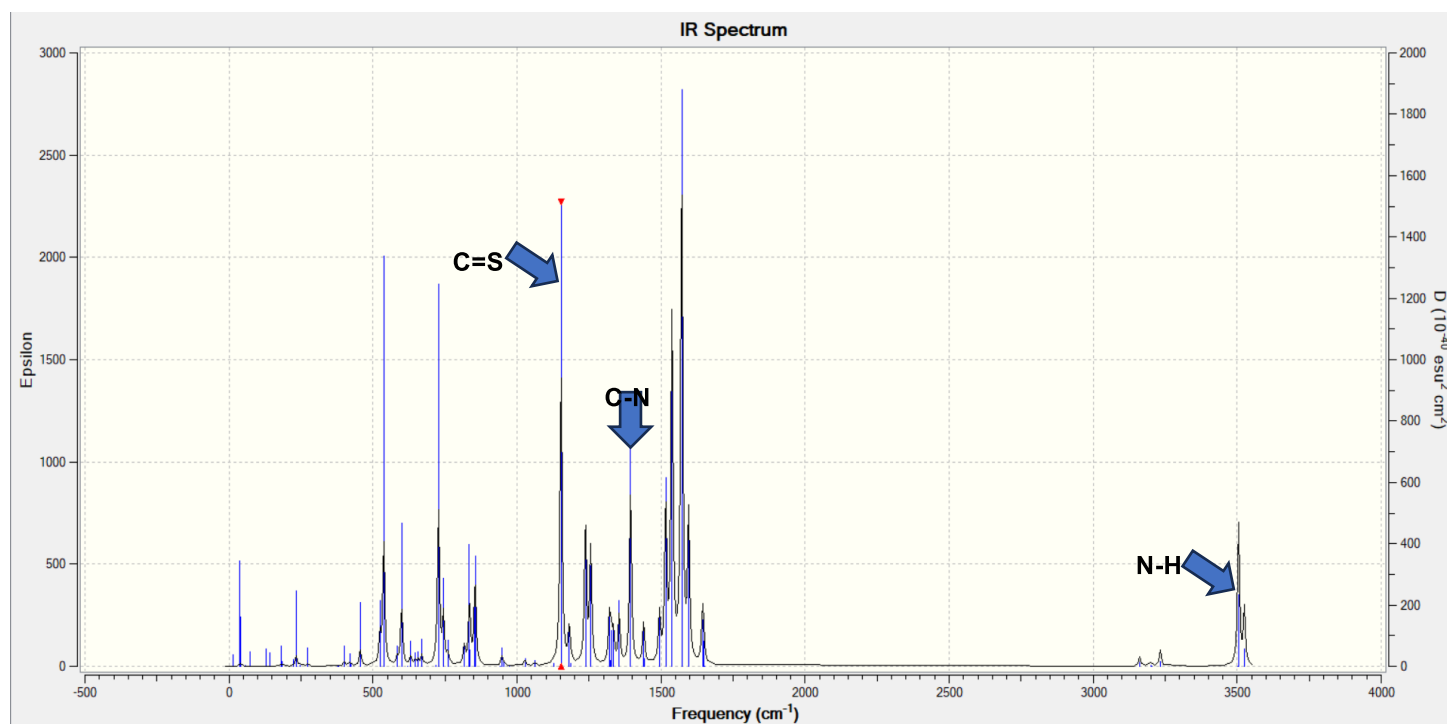

**Figure S3.** Theoretical IR Spectrum of **3** calculated using Gaussian 09/ B3LYP/ 6-311++ G (d,p).

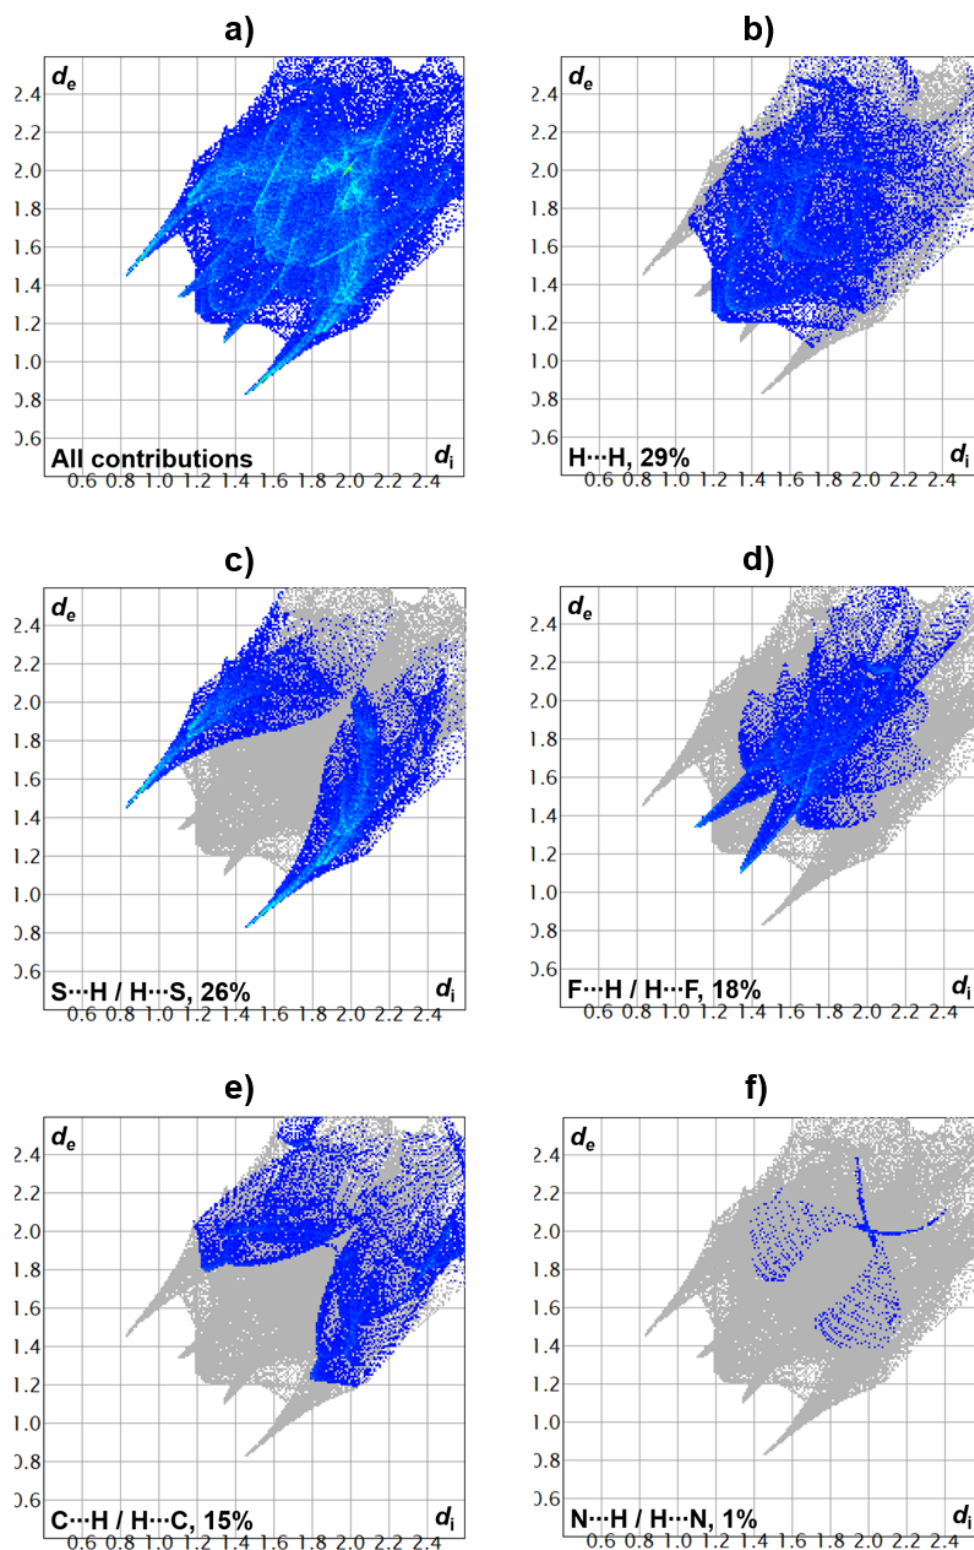

**Figure S4.** Fingerprint plots from the Hirshfeld analysis of compound 3. The respective interactions are highlighted in the corresponding two-dimensional diagrams: All contributions (a), H...H contacts (b), S...H / H...S contacts (c), F...H / H...F contacts (d), C...H / H...C contacts (e), N...H / H...N contacts (f) showing the percentages participations to the total Hirshfeld surface area.

### DFT Calculation study of bis(*N*-p-fluorophenylthiourea) **3**

**Table S1.** DFT summary results of **3** in gaseous phase

| Title Card Required                                   |                |       |
|-------------------------------------------------------|----------------|-------|
| File Name                                             | OPT1 B3367     |       |
| File Type                                             | .log           |       |
| Calculation Type                                      | FREQ           |       |
| Calculation Method                                    | RB3LYP         |       |
| Basis Set                                             | 6-311++G(d,p)  |       |
| Charge                                                | 0              |       |
| Spin                                                  | Singlet        |       |
| E(RB3LYP)                                             | -1756.09346211 | a.u.  |
| RMS Gradient Norm                                     | 0.00000189     | a.u.  |
| Imaginary Freq                                        | 0              |       |
| Dipole Moment                                         | 0.3136         | Debye |
| Point Group                                           | C1             |       |
| Job cpu time: 0 days 7 hours 38 minutes 17.0 seconds. |                |       |

**Table S2.** DFT summary results of **3** in ethanol

| Title Card Required                                    |                    |       |
|--------------------------------------------------------|--------------------|-------|
| File Name                                              | OPT1 B3367 ETHANOL |       |
| File Type                                              | .log               |       |
| Calculation Type                                       | FREQ               |       |
| Calculation Method                                     | RB3LYP             |       |
| Basis Set                                              | 6-311++G(d,p)      |       |
| Charge                                                 | 0                  |       |
| Spin                                                   | Singlet            |       |
| E(RB3LYP)                                              | -1756.11462516     | a.u.  |
| RMS Gradient Norm                                      | 0.00000469         | a.u.  |
| Imaginary Freq                                         | 0                  |       |
| Dipole Moment                                          | 0.1078             | Debye |
| Point Group                                            | C1                 |       |
| Job cpu time: 0 days 13 hours 41 minutes 40.0 seconds. |                    |       |

**Table S3.** Selected torsion angles (°) from X-ray diffraction and DFT optimization of **3**

| Torsion angles (°) | Exp<br>SCXRD | Calc.<br>in gas | Calc.<br>in EtOH |
|--------------------|--------------|-----------------|------------------|
| C5-N4-N21-C22      | -125.65      | -127.52         | -119.95          |
| H16-N4-N21-H33     | -54.93       | -52.58          | -57.81           |
| S1-C5-N4-N21       | -166.61      | -163.61         | -167.07          |
| N3-C5-N4-N21       | 15.25        | 18.12           | 13.94            |
| C6-N3-C5-N4        | 174.83       | 177.02          | 176.02           |

\*The atom numbering is shown in the optimized structure of **3**
